# Supplementary material for: Pre-bilaterian origin of the blastoporal axial organizer
Source: PubMed Central journal article supplement (PMC4895019; doi:10.1038/ncomms11694), 2016-05-27
Supplement: ncomms11694-s1.pdf [file ncomms11694-s1.pdf]

## Supplementary Figures

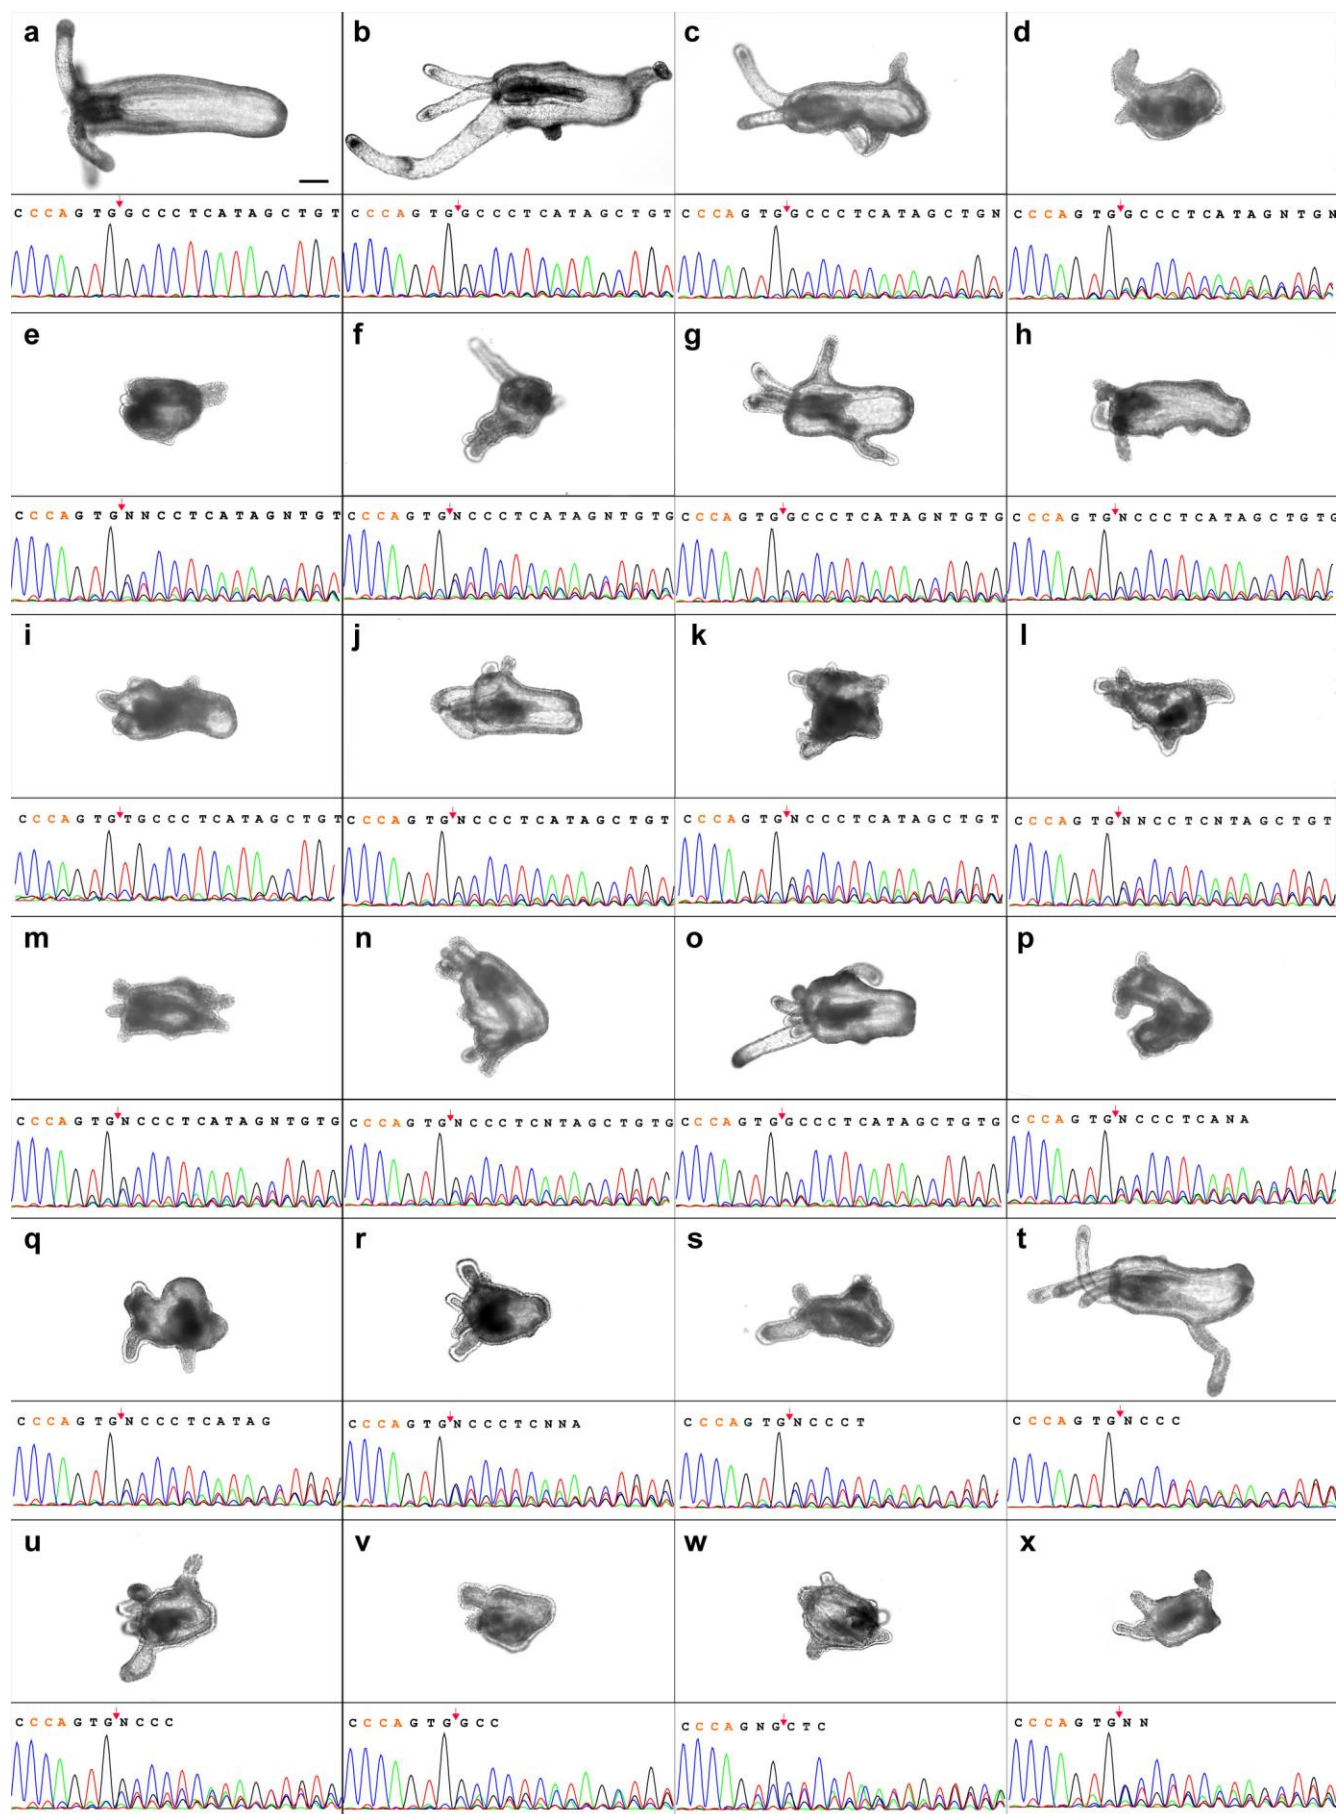

## Supplementary Figure 1.

### **CRISPR-Cas9 mutagenesis of *APC* leads to formation of ectopic head structures in mosaic mutants.**

**(a)** Control primary polyp and the sequencing chromatogram of the locus recognized by the *APC* guide RNA from a pool of 10 control primary polyps injected with *APC* guide RNA alone. Note the absence of sequence variability in the region of interest. **(b-x)** Mutant primary polyps with ectopic head structures (tentacles, pharynges) and corresponding sequencing chromatograms of the *APC* guide RNA target locus. Note the positions with multiple peaks indicating the presence of mutations. PAM sequence is highlighted orange; red arrow points at the expected Cas9 cleavage site. Scale bar: 100  $\mu\text{m}$ .

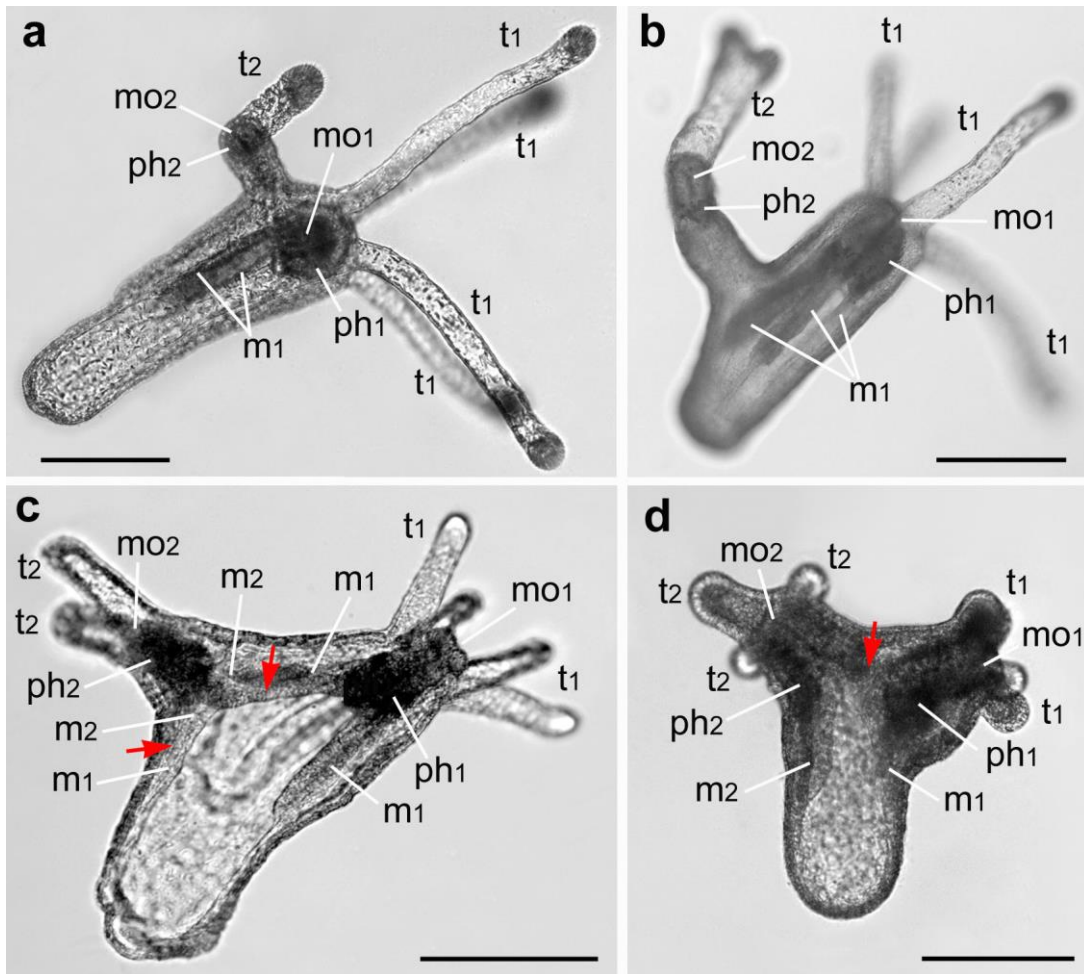

**Supplementary Figure 2.**

**Blastopore lip transplantation and *Wnt1/Wnt3* plasmid injection yield similar outcomes.**

(a-b) Examples of incomplete secondary axes with single tentacles, mouths, pharynges and no mesenteries in 7 days post-fertilization primary polyps after transplantation of a fragment of the blastopore lip at the mid-gastrula stage (a), and after injection of a mixture of *EF1 $\alpha$ ::Wnt1* and *EF1 $\alpha$ ::Wnt3* into a single blastomere at the 8-cell stage (b). (c-d) Examples of complete secondary axes with tentacles, mouths, pharynges and contractile mesentery systems in 7 days post-fertilization primary polyps after transplantation of a fragment of the blastopore lip at the mid-gastrula stage (c), and after injection of a mixture of *EF1 $\alpha$ ::Wnt1* and *EF1 $\alpha$ ::Wnt3* into a single blastomere at 8-cell stage (d).

Annotated structures: tentacles on the main (t1) and ectopic (t2) body axes; pharynges on the main (ph1) and ectopic (ph2) body axes; mouth openings on the main (mo1) and ectopic (mo2) body axes; contractile

mesenteries on the main (m1) and ectopic (m2) body axes. Red arrows point at mesenteries belonging to both the main and the ectopic axes. Scale bars: 100  $\mu\text{m}$ .

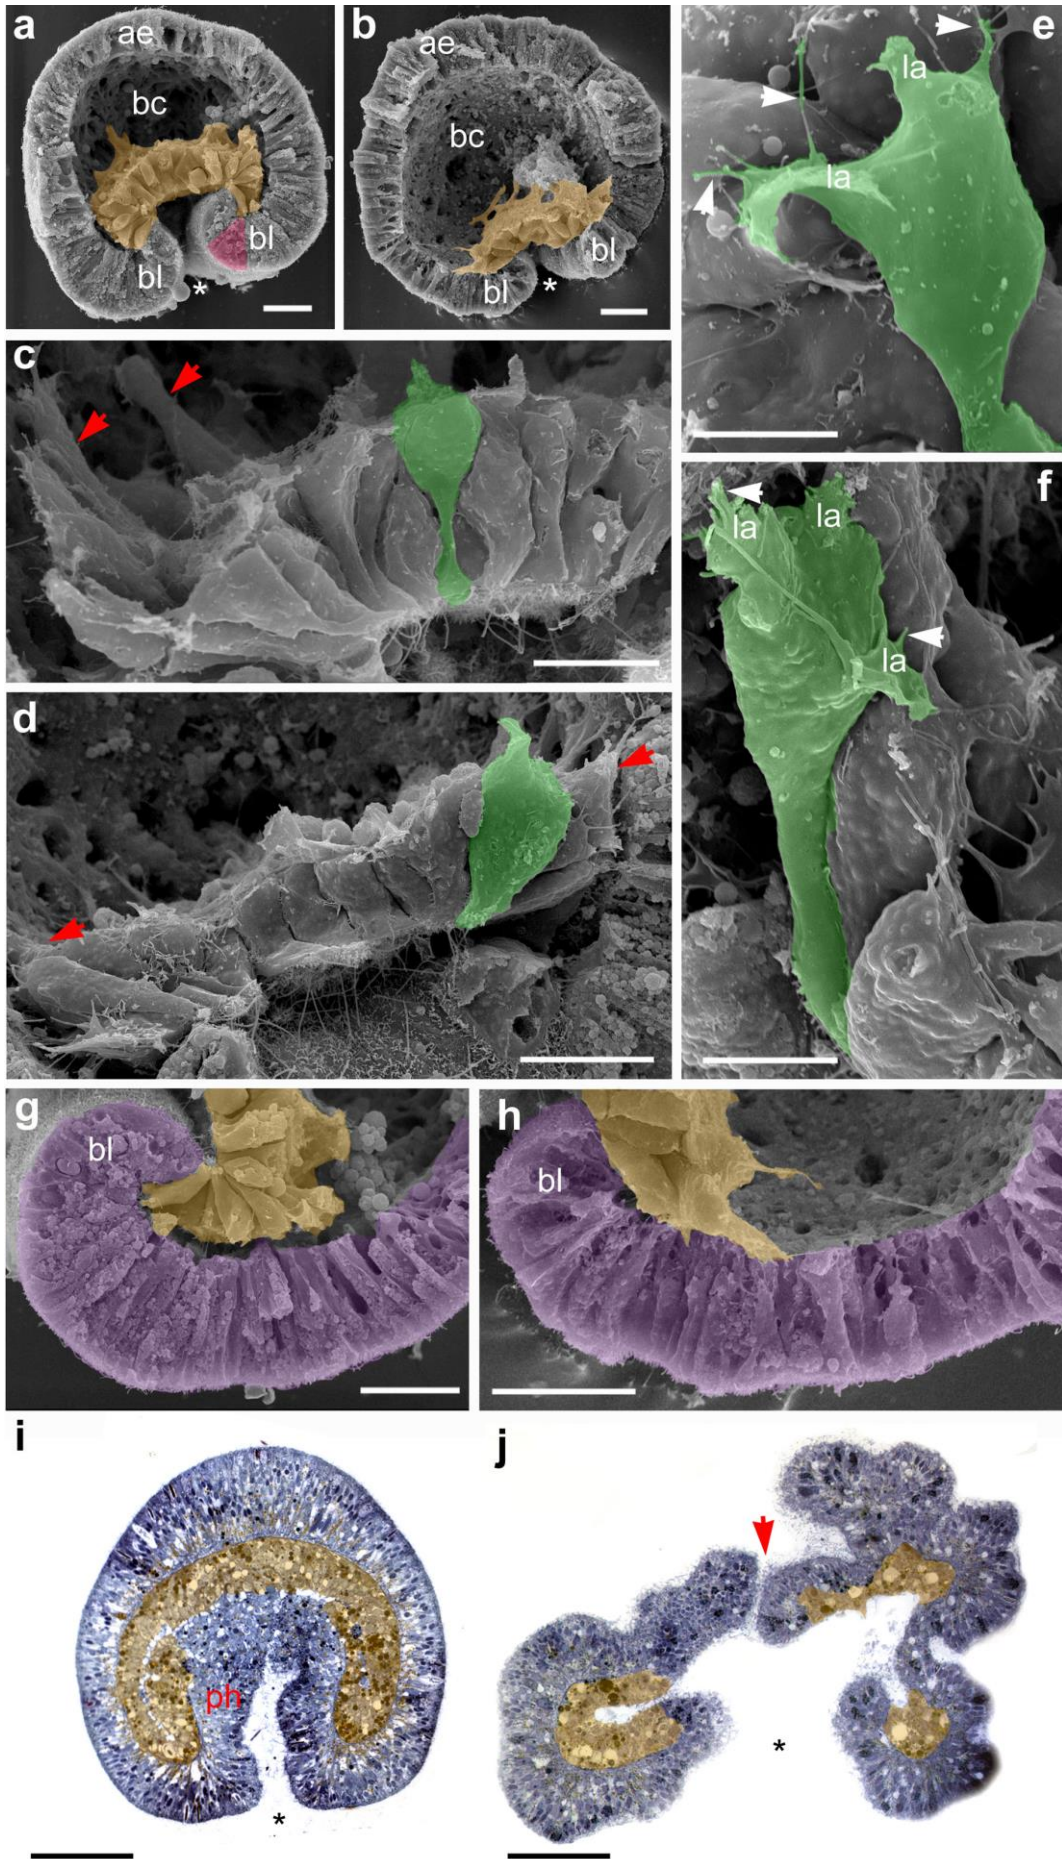

### Supplementary Figure 3.

#### Morphology of gastrulae and 72 hpf planulae subjected to DMSO or early AZK treatment.

24 hpf mid-gastrulae on **(a-h)** were split into halves along the oral-aboral axis prior to SEM; 72 hpf planulae on **(i, j)** were semithin sectioned along the oral-aboral axis prior to toluidine blue staining. **(a-b)** Overviews of the 24 hpf control **(a)** and 2.5  $\mu\text{M}$  AZK treated **(b)** gastrulae. Pre-endodermal plates of both embryos (orange highlight) invaginate, although the pre-endodermal plate cells of the AZK treated embryo appear smaller. bl –blastopore lip; bc – blastocoel; ae – aboral ectoderm. **(c-d)** Pre-endodermal plate cells have typical bottle cell morphology both in DMSO **(c)** and in 2.5  $\mu\text{M}$  AZK **(d)**. Red arrows point at the endodermal cells climbing up the basal surfaces of the ectodermal cells. In each plate one bottle cell is highlighted green. **(e-f)** The leading edges of the bottle cells in DMSO **(e)** and 2.5  $\mu\text{M}$  AZK treated **(f)** gastrulae bear multiple protrusions typical for bottle cells of higher metazoans. la – lamellae; white arrows - filopodia. **(g-h)** SEM of the blastopore lip areas of the DMSO **(g)** and 2.5  $\mu\text{M}$  AZK **(h)** treated embryo shows clear morphological difference between the columnar epithelial cells of the ectoderm wall (magenta highlight) and the bottle cells of the pre-endodermal plate (orange highlight). **(i-j)** DMSO treated 72 hpf planula **(i)** and a planula subjected to the early treatment with 5  $\mu\text{M}$  AZK **(j)**; endoderm highlighted orange. Control planula **(i)** is teardrop-shaped and has a well-developed pharynx (ph); AZK treated planula **(j)** is flat, its blastopore re-opened to form a large hole, and an additional opening is visible in its aboral surface (arrow). Asterisks denote the blastopores. Scale bars: **a, b** - 30  $\mu\text{m}$ ; **c, d** - 20  $\mu\text{m}$ ; **e, f** - 10  $\mu\text{m}$ ; **g, h** - 30  $\mu\text{m}$ ; **i** - 50  $\mu\text{m}$ ; **j** - 20  $\mu\text{m}$ .

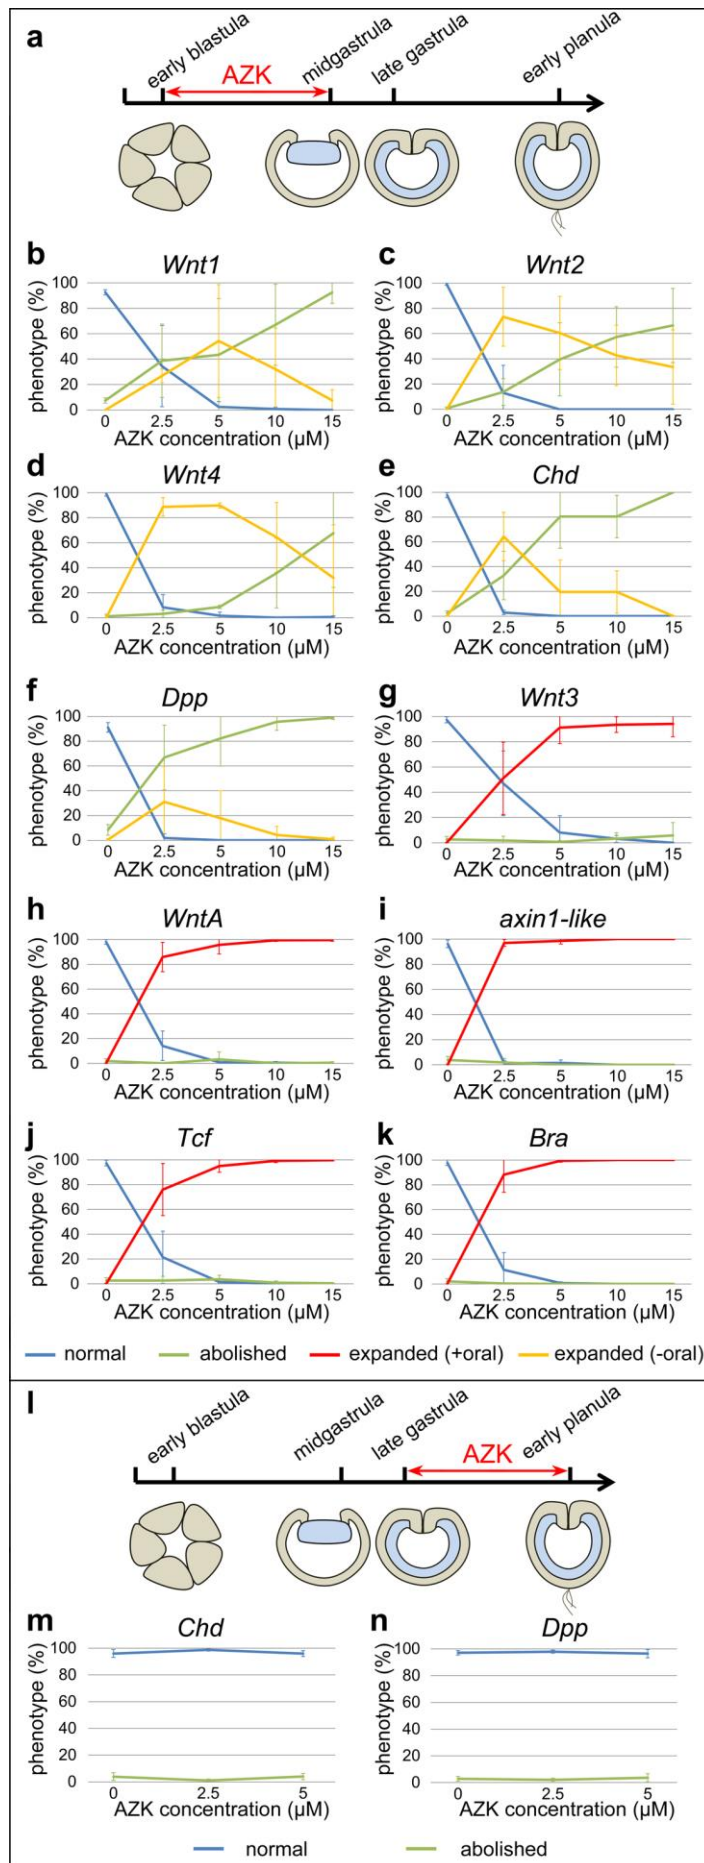

## Supplementary Figure 4.

### Quantification of the penetrance of in situ hybridization phenotypes in AZK experiments.

Three independent experiments were performed for each gene and each AZK concentration. 0  $\mu$ M AZK stands for DMSO control. The sample sizes for each experiment are presented in Supplementary Tables 1 and 2. Phenotypic categories: normal – wild type expression; abolished – no expression; expanded (-oral) – expression domain expands towards the aboral end and vacates the oral end of the embryo; expanded (+oral) – expression domain expands towards the aboral end, but expression is retained at the oral end. Bars represent standard deviations. **(a-k)** Effect of early AZK treatment on the expression of the ectodermal *Wnt* genes, *Chd*, *Dpp*, *axin1-like*, *Tcf* and *Bra*. **(a)** Scheme of experiment. **(b-k)** Penetrance of the in situ hybridization phenotypes. **(l-n)** Effect of the late 2.5  $\mu$ M AZK treatment on the expression of *Chd* and *Dpp*. **(l)** Scheme of experiment. **(m, n)** Penetrance of the in situ hybridization phenotypes.



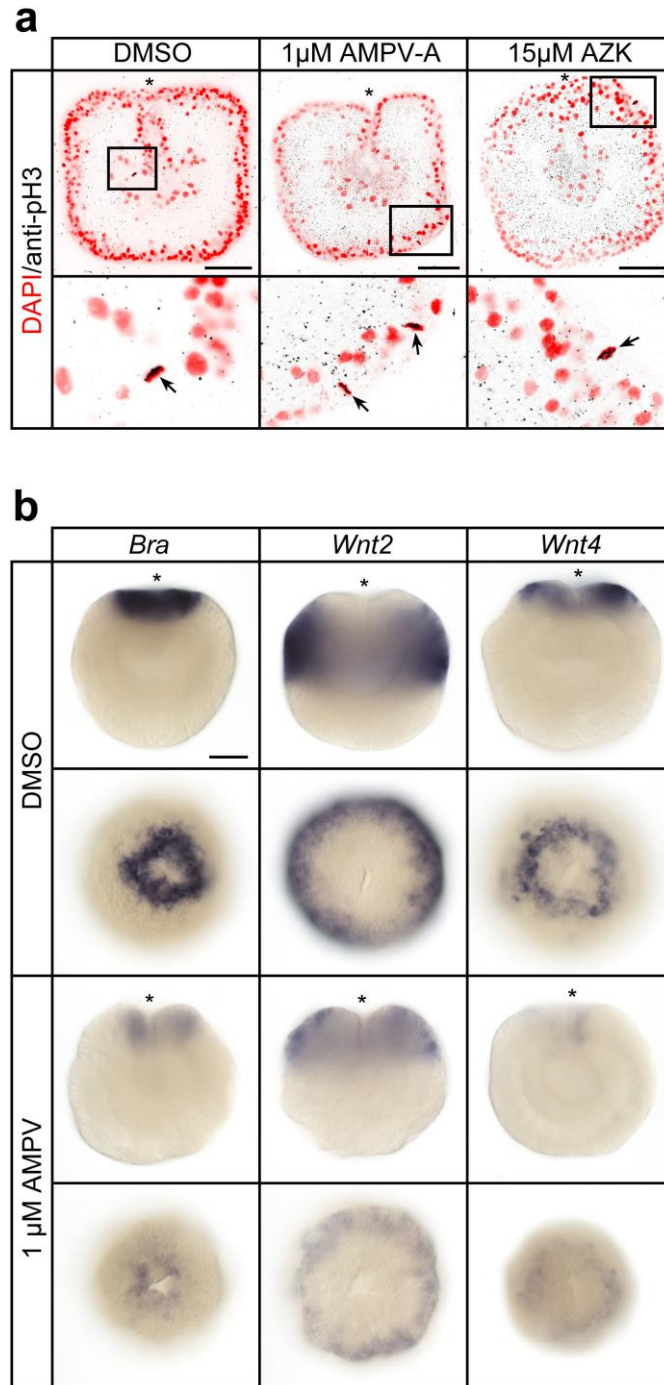

**Supplementary Figure 5.**

**Expression domain changes observed in AZK are not due to inhibition of CDK1.**

(a) DAPI and anti-phospho-Histone H3 antibody staining shows that metaphase plates are observed in the DMSO control, 15 $\mu$ M AZK and 1 $\mu$ M AMPV treated embryos. Areas boxed on top images are shown at higher magnification below. Arrows point at metaphase plates. Asterisks denote the blastopores. (b) Expression of *Wnt2*, *Wnt4* and *Bra* appears weaker in AMPV treated embryos than in control, but

expression domains remain the same. A lateral view (top, blastopore marked with an asterisk) and a corresponding oral view (bottom) is shown for each embryo. Scale bars: 50  $\mu\text{m}$ .

## Supplementary Tables

**Supplementary Table 1. Sample size (number of embryos) in the early AZK treatment experiment.**

| <i>Wnt1</i>       | DMSO | 2,5µM AZK | 5µM AZK | 10µM AZK | 15µM AZK |
|-------------------|------|-----------|---------|----------|----------|
| experiment 1      | 182  | 75        | 148     | 99       | 125      |
| experiment 2      | 140  | 132       | 111     | 200      | 209      |
| experiment 3      | 177  | 166       | 158     | 126      | 58       |
| <i>Wnt2</i>       | DMSO | 2,5µM AZK | 5µM AZK | 10µM AZK | 15µM AZK |
| experiment 1      | 134  | 224       | 191     | 197      | 202      |
| experiment 2      | 159  | 206       | 234     | 154      | 176      |
| experiment 3      | 227  | 110       | 110     | 122      | 245      |
| <i>Wnt3</i>       | DMSO | 2,5µM AZK | 5µM AZK | 10µM AZK | 15µM AZK |
| experiment 1      | 144  | 140       | 243     | 134      | 150      |
| experiment 2      | 85   | 233       | 230     | 200      | 261      |
| experiment 3      | 120  | 140       | 188     | 254      | 163      |
| <i>Wnt4</i>       | DMSO | 2,5µM AZK | 5µM AZK | 10µM AZK | 15µM AZK |
| experiment 1      | 187  | 214       | 177     | 205      | 116      |
| experiment 2      | 134  | 324       | 210     | 216      | 249      |
| experiment 3      | 105  | 111       | 195     | 197      | 162      |
| <i>WntA</i>       | DMSO | 2,5µM AZK | 5µM AZK | 10µM AZK | 15µM AZK |
| experiment 1      | 115  | 200       | 157     | 134      | 199      |
| experiment 2      | 134  | 159       | 188     | 340      | 72       |
| experiment 3      | 91   | 77        | 261     | 194      | 208      |
| <i>axin1-like</i> | DMSO | 2,5µM AZK | 5µM AZK | 10µM AZK | 15µM AZK |
| experiment 1      | 85   | 288       | 99      | 188      | 221      |
| experiment 2      | 152  | 170       | 257     | 236      | 228      |
| experiment 3      | 208  | 198       | 171     | 77       | 118      |
| <i>Tcf</i>        | DMSO | 2,5µM AZK | 5µM AZK | 10µM AZK | 15µM AZK |
| experiment 1      | 166  | 120       | 83      | 159      | 199      |
| experiment 2      | 113  | 172       | 285     | 225      | 355      |
| experiment 3      | 120  | 290       | 131     | 152      | 189      |
| <i>Bra</i>        | DMSO | 2,5µM AZK | 5µM AZK | 10µM AZK | 15µM AZK |
| experiment 1      | 184  | 104       | 187     | 245      | 207      |
| experiment 2      | 147  | 203       | 199     | 221      | 288      |
| experiment 3      | 152  | 101       | 84      | 199      | 169      |
| <i>Chd</i>        | DMSO | 2,5µM AZK | 5µM AZK | 10µM AZK | 15µM AZK |
| experiment 1      | 137  | 108       | 188     | 134      | 153      |
| experiment 2      | 197  | 189       | 236     | 195      | 229      |
| experiment 3      | 157  | 80        | 125     | 164      | 184      |
| <i>Dpp</i>        | DMSO | 2,5µM AZK | 5µM AZK | 10µM AZK | 15µM AZK |
| experiment 1      | 197  | 217       | 140     | 227      | 156      |
| experiment 2      | 175  | 209       | 221     | 220      | 216      |
| experiment 3      | 179  | 68        | 173     | 153      | 142      |

**Supplementary Table 2. Sample size (number of embryos) in the late AZK treatment experiment.**

| <i>Chd</i>   | DMSO | 2,5 $\mu$ M AZK | 5 $\mu$ M AZK |
|--------------|------|-----------------|---------------|
| experiment 1 | 112  | 190             | 141           |
| experiment 2 | 136  | 140             | 161           |
| experiment 3 | 182  | 249             | 139           |

  

| <i>Dpp</i>   | DMSO | 2,5 $\mu$ M AZK | 5 $\mu$ M AZK |
|--------------|------|-----------------|---------------|
| experiment 1 | 99   | 226             | 115           |
| experiment 2 | 116  | 146             | 104           |
| experiment 3 | 134  | 205             | 228           |
